# Supplementary material for: Adipocyte Death, Adipose Tissue Remodeling, and Obesity Complications
Source: Oxford University Press journal article supplement (doi:10.2337/db07-0767), 2007-09-12
Supplement: db070767onlineappendixlegends.doc [file db070767onlineappendixlegends.doc]

**FIGURE LEGENDS (online appendix)**

**Figure 1. F4/80 immunohistochemistry (brown stain) of (eAT) at DIO week 16 reveals F4/80- cells in the interstitium between F4/80+ crown like structures**. Section was counterstained with hematoxylin (blue stain).

**Figure 2. Morphometric parameters and MΦ marker gene expression in inguinal subcutaneous (iAT) during DIO. A**) iAT adipocyte number. **B**) iAT adipocyte size (volume). **C**) iAT weight. Depot weight is expressed as a function of body weight. Data are of 6-8 mice per time point. **D**) Real-time PCR data for F4/80, CD68, CD11b, and CD11c are expressed as fold difference (Ct) in gene expression relative to baseline (see Research Design and Methods). Data are from 4 to 6 mice per time point.

**Figure 3. Changes in levels of circulating adipokines over the DIO time course.**  Leptin, resistin, and adiponectin were assayed in serum from HF and LF-fed mice fasted overnight. Data are from 4 to 6 mice per time point.

**Figure 4. Levels of non-esterified free fatty acids (NEFAs) in serum of high fat-fed mice during the DIO time course.**  Enzymatic colorimetric assay (NEFA-c kit) was used to measure NEFAs in serum collected from mice after an overnight fast. Data are from 4 to 6 mice per time point.

**Figure 5. Obesity-associated adipocyte death and CD11c gene expression in retroperitoneal and mesenteric fat compared to inguinal subcutaneous and epidiymal AT. A**) Dead adipocytes in AT depots of HF-fed mice (14 weeks of DIO) were quantified from histological sections (see Research Design and Methods). **B**) Expression of CD11c mRNA by Real-time PCR coincides with the incidence of adipocyte death in the different depots. Data are from 4 mice per depot expressed relative to LF-fed eAt. *iAT = inguinal sub-cutaneous, eAT = epididymal, r = retroperitoneal, and m = mesenteric.*
